# Supplementary material for: Branch-structured Bi2S3–CNT hybrids with improved lithium storage capability
Source: Royal Society of Chemistry journal article supplement (doi:10.1039/c4ta02717e), 2014-01-01
Supplement: c4ta02717e1.pdf [file c4ta02717e1.pdf]

## Branch-structured Bi<sub>2</sub>S<sub>3</sub>-CNT hybrids with improved lithium storage capability

Yang Yang Zhao,<sup>a‡</sup> Tingting Liu,<sup>a‡</sup> Hui Xia,<sup>b</sup> Ling Zhang,<sup>a</sup> Jiaying Jiang,<sup>c</sup> Ming Shen,<sup>d</sup> Jiangfeng Ni<sup>\*a</sup> and Lijun Gao<sup>a</sup>

<sup>a</sup> School of Energy, College of Physics, Optoelectronics and Energy & Collaborative Innovation Center of Suzhou Nano Science and Technology, Soochow University, Suzhou 215006, China.

<sup>b</sup> Herbert Gleiter Institute of Nanoscience, Nanjing University of Science and Technology, Nanjing 210094, China

<sup>c</sup> Wuxi Jiefu Electroacoustic Co.,Ltd, Wuxi, Jiangsu 214192, China

<sup>d</sup> Huasheng Chemical Corporation, Zhangjiagang, Jiangsu 215635, China

‡ These authors contributed equally to this work.

\* Corresponding author. Tel/Fax: +86-512-67875503, Email: jeffni@suda.edu.cn

### Figure captions

**Fig. S1** SEM (a) and TEM (b) images of free Bi<sub>2</sub>S<sub>3</sub> microspheres.

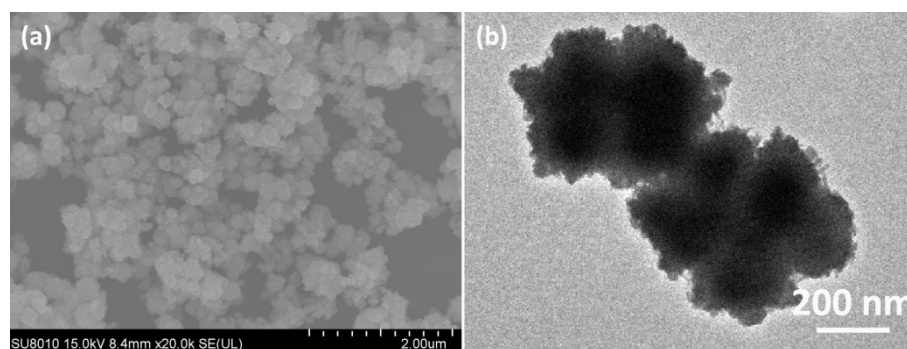

**Fig. S1**

**Fig. S2** (a) Initial charge and discharge curves of Bi<sub>2</sub>S<sub>3</sub> microspheres. (b) Cycling performance of Bi<sub>2</sub>S<sub>3</sub> microspheres at various current rates.

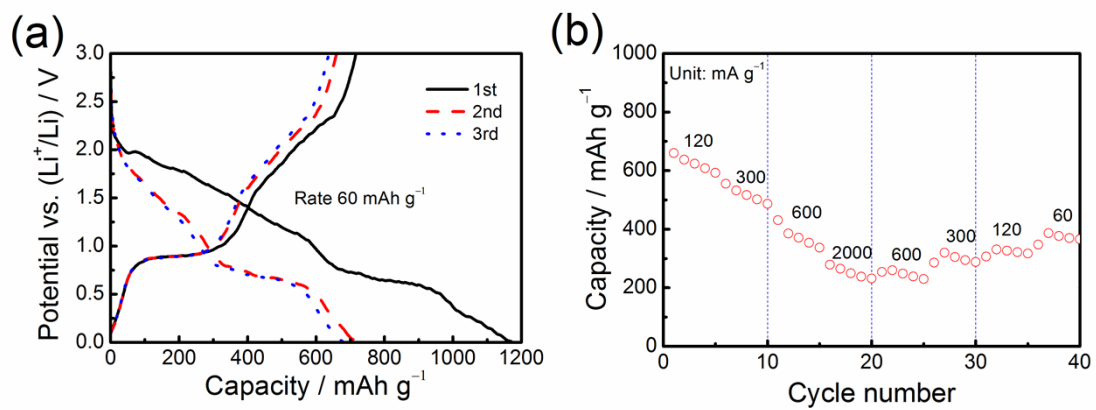

Fig. S2
